# Supplementary material
Source: PubMed Central journal article supplement (PMC3976560)
Supplement: NIHMS508194-supplement-1.pdf [file NIHMS508194-supplement-1.pdf]

## SUPPLEMENTAL DATA LEGENDS

**Figure S1.** OPAH structures and CYP1A expression: Table displays OPAH name, structure, and presence or absence of vascular and liver CYP1A protein expression.

**Figure S2.** Developmental OPAH Toxicity: Heatmap displays the percent incidences of each malformation for the dose response, 0 – 100 $\mu$ M for each OPAH. The color scale increases from white to red in 1% increments, where grey represents morphological endpoints not evaluated because of 100% mortality at that concentration.

**Figure S3.** Low Dose Developmental OPAH Toxicity: Heatmap displays the percent incidences of each malformation for the dose response, 0 – 20 $\mu$ M for the most toxic OPAHs, causing 100% mortality at 4 $\mu$ M or 20 $\mu$ M. The color scale increases from white to red in 1% increments, where grey represents morphological endpoints not evaluated because of 100% mortality at that concentration.

**Figure S4.** EC<sub>50</sub> values: Table lists the calculated EC<sub>50</sub> values for each morphological endpoint, for all OPAHs. These EC<sub>50</sub> values are visualized in the Figure 1 heatmap.

**Figure S5.** qRT-PCR primers: Table lists the gene names and primer sequences used for the qRT-PCR analysis.

Supplemental Figure 1

| OPAH                     | STRUCTURE                                                                           | CYP1A<br>VASCULATURE | CYP1A<br>LIVER | NO<br>CYP1A | OPAH                                | STRUCTURE                                                                             | CYP1A<br>VASCULATURE | CYP1A<br>LIVER | NO<br>CYP1A |
|--------------------------|-------------------------------------------------------------------------------------|----------------------|----------------|-------------|-------------------------------------|---------------------------------------------------------------------------------------|----------------------|----------------|-------------|
| 1,4-Benzoquinone         |    |                      |                | x           | Phenanthrene-quinone                |    |                      |                | X           |
| Chromone                 |    |                      |                | X           | 1-Hydroxyanthraquinone              |    |                      | X              |             |
| 1,2-Naphthoquinone       |    |                      |                | X           | 2-Hydroxyanthraquinone              |    |                      |                | X           |
| 1,4-Naphthoquinone       |    |                      |                | N/A         | 1,2-Dihydroxyanthraquinone          |    |                      |                | X           |
| 1,3-Dihydroxynaphthalene |    |                      | X              |             | 1,4-Dihydroxyanthraquinone          |    |                      |                | X           |
| 1,5-Dihydroxynaphthalene |    | X                    |                |             | 1,8-Dihydroxyanthraquinone          |    |                      | X              |             |
| 1,6-Dihydroxynaphthalene |    |                      |                | X           | 2,6-Dihydroxyanthraquinone          |    |                      |                | X           |
| 2,3-Dihydroxynaphthalene |    | X                    |                |             | Benzo[a]fluorenone                  |    | X                    |                |             |
| 2,6-Dihydroxynaphthalene |    |                      |                | X           | 4H-Cyclopenta[def]phenanthren-4-one |    |                      |                | X           |
| 2,7-Dihydroxynaphthalene |  |                      |                | X           | Aceanthraquinone                    |  | X                    |                |             |
| 9-Fluorenone             |  |                      |                | X           | 1,9-Benz-10-anthrone                |  |                      |                | X           |
| 1-Hydroxy-9-Fluorenone   |  |                      |                | X           | 5,12-Naphthacenequinone             |  | X                    |                |             |
| 2-Hydroxy-9-Fluorenone   |  |                      |                | X           | Benz(a)anthracene-7,12-dione        |  | X                    |                |             |
| Acenaphthenquinone       |  |                      |                | X           | Benzo[c]phenanthrene-1,4-dione      |  |                      |                | X           |
| Perinaphthenone          |  |                      |                | X           | Pyrene-4,5-dione                    |  |                      |                | X           |
| Xanthone                 |  |                      | X              |             | 9-Hydroxybenzo[a]pyrene             |  |                      |                | X           |
| 1,4-Anthraquinone        |  |                      |                | X           | 10-Hydroxybenzo[a]pyrene            |  | X                    |                |             |
| 9,10-Anthraquinone       |  |                      |                | X           | 12-Hydroxybenzo[a]pyrene            |  | X                    |                |             |
| Phenanathrene-1,4-dione  |  | X                    |                |             | 6H-Benzo[cd]pyren-6-one             |  |                      |                | X           |

# OPAH Dose Response Data

## Color Key

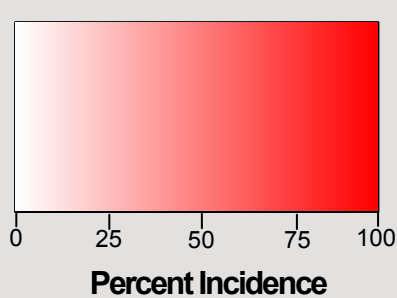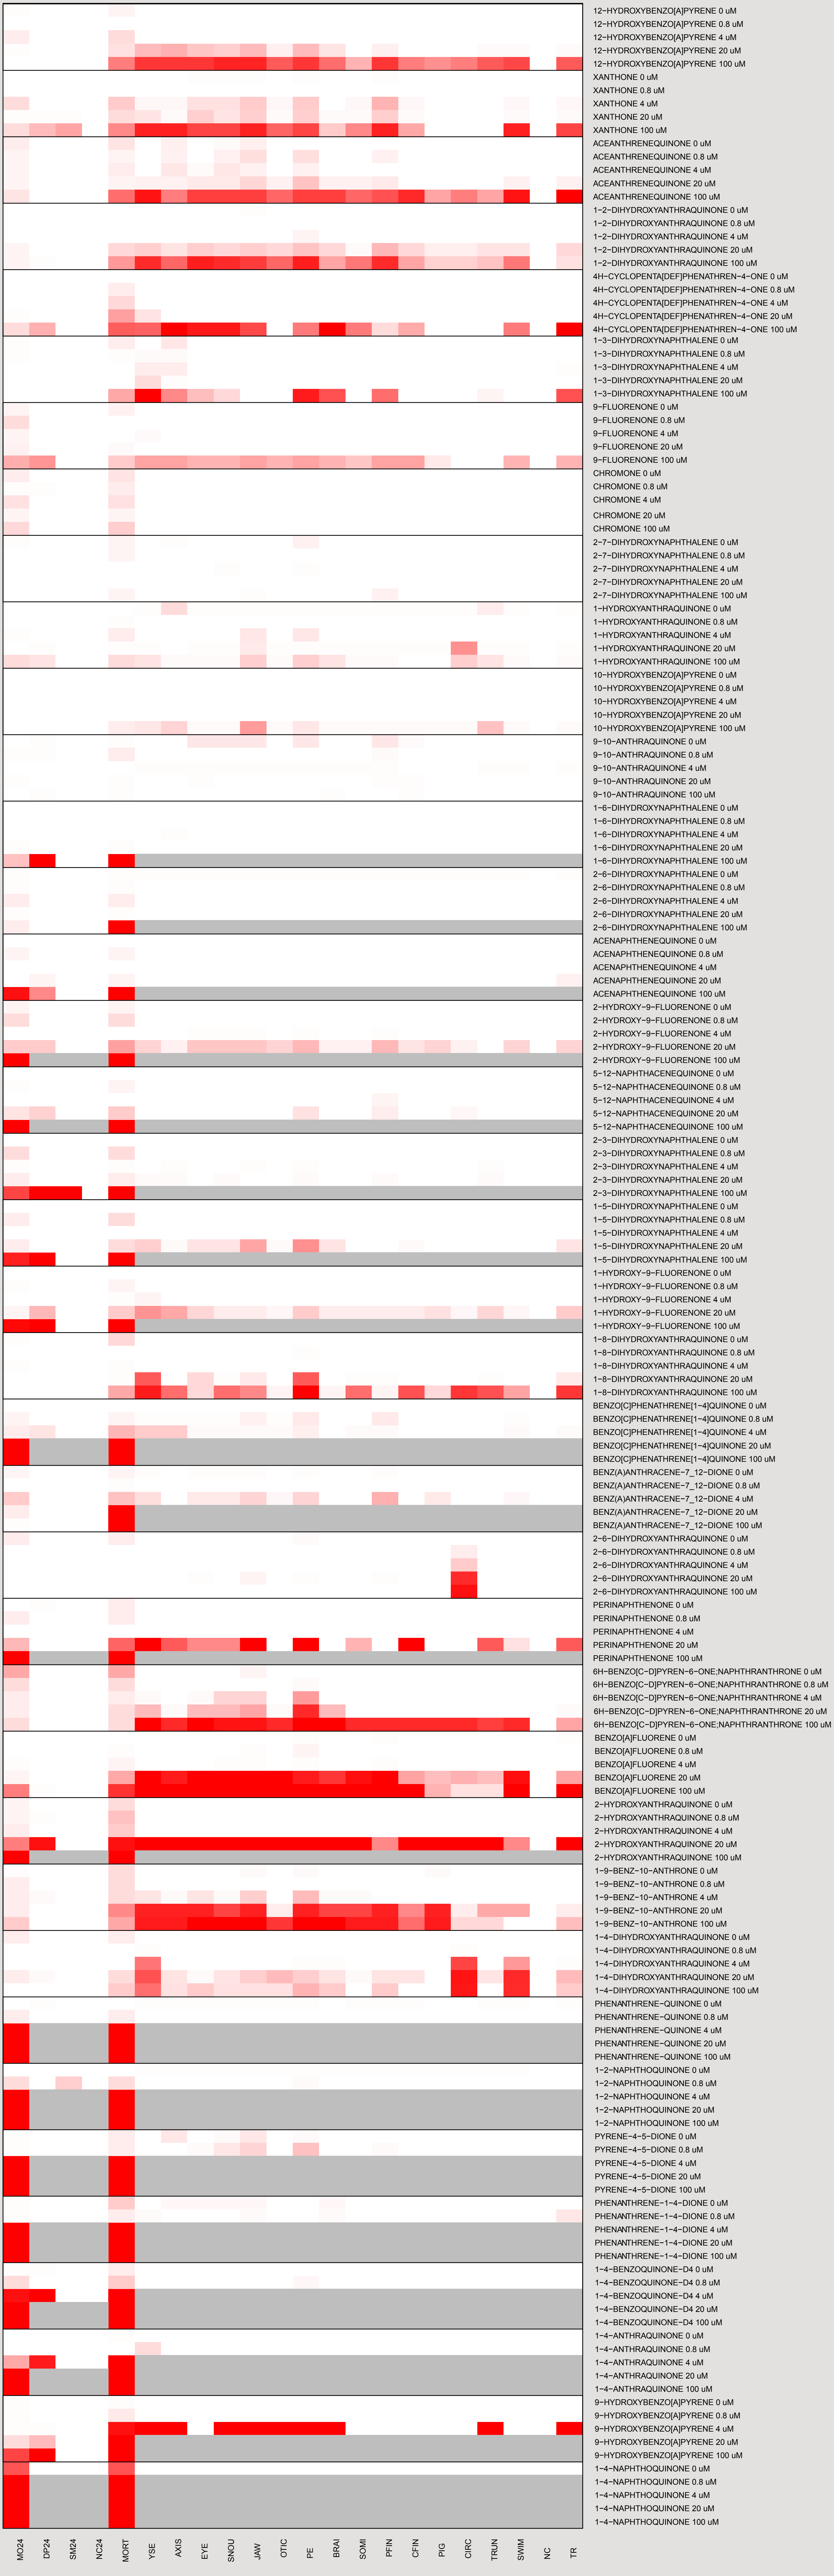





Supplemental Figure 5

| Gene         | Forward Primer (5'- 3')   | Reverse Primer (5'- 3')    |
|--------------|---------------------------|----------------------------|
| AHR1A        | CGCAAAGGAGGAAACCTGTC      | CCTGTAGCAAAAATTCCCCCT      |
| CYP1A        | TGCCGATTCATCCCTTCC        | AGAGCCGTGCTGATAGTGTC       |
| CYP1B1       | CTGCATTGATTTCCGAGACGTG    | CACACTCCGTGTTGACAGC        |
| CYP1C1       | AGTGGCACAGTCTACTTTGAGAG   | TCGTCCATCAGCACTCAG         |
| CYP1C2       | GTGGTGGAGCACAGACTAAG      | TTCAGTATGAGCCTCAGTCAAAC    |
| gst p1       | TTCAGTCCAACGCCATGC        | ATGAGATCTGATCGCCAACC       |
| gst p2       | TCTGGACTCTTCCCGTCTCTCAA   | ATTCAGTCTTCCCGTTGCCGT      |
| gst $\kappa$ | AAATTGCACTGCACTCGCAAGC    | TGTAGCGACACAGCACCTCAAATG   |
| gst $\alpha$ | GTCGTGCTGCATTAATTCAATGGC  | AACACTGGAAGGAAGCGCACTTTG   |
| SOD1         | CGCATGTTCCAGACATCTA       | GAGCGGAAGATTGAGGATTG       |
| SOD2         | CTAGCCCGCTGACATTACATC     | TTGCCACATAGAAATGCAC        |
| SOD L        | AACCTGCGTGGATTTCTGAAACTG  | TGAGGCTTGGTGTATGCCAATAACAC |
| gclc         | CTATCTGGAGAACATGGAGG      | CATTTTCCTCTGTTGACCGG       |
| gclm         | TGGCTTCGTCAGCACACTAAAGTG  | TCACGGGAACATTAACAGGCC      |
| gpx 1a       | AGATGTCATTCTGCACACG       | AAGGAGAAGCTTCCTCAGCC       |
| gpx 1b       | TCTTGAGAAAGTGGACGTGAACG   | TGCTATGCTAAGCAAGAACGGGAC   |
| gpx 7        | TTGTGGGTATTGGGGCAAACAATGC | TAATCTCACGCTGCGCTGTTGAAG   |
| gpx 8        | TTTTAACGTGCTCGCGTTTCCCTG  | ATTCCTGACAAGCGTTGTGGCTTC   |
| nrf-2        | CAGACGGAGGAGGAGCGGGA      | GGCACTGCTGCAACTCTGGGA      |
| nqo1         | AGCACAAGGTGGAGCAGGCG      | CGCAGCACTCCATTCTGTAAGGGC   |
| hmox         | TGTTGAAGGCGTAAGACTCC      | GGTGTAAAGCGTGCGCCACCA      |
| B-actin      | AAGCAGGAGTACGATGAGTC      | TGGAGTCCTCAGATGCATTG       |
